# Supplementary material for: Role of HIV-specific CD8+ T cells in pediatric HIV cure strategies after widespread early viral escape
Source: PubMed Central journal article supplement — J Exp Med. 2017 Nov 6;214(11):3239–61. doi: 10.1084/jem.20162123 (PMC5679167; doi:10.1084/jem.20162123), 2017-11-06
Supplement: JEM_20162123_sm.pdf [file JEM_20162123_sm.pdf]

SUPPLEMENTAL MATERIAL

Leitman et al., <https://doi.org/10.1084/jem.20162123>

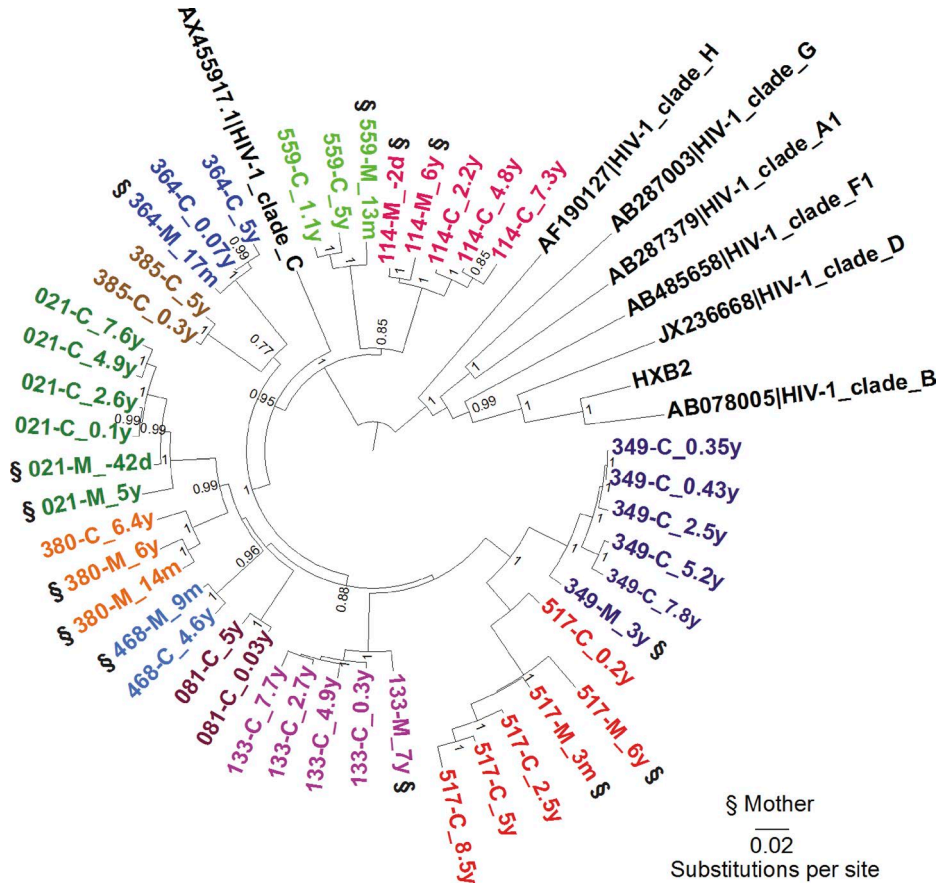

Figure S1. Maximum-likelihood phylogenetic tree from 43 full-genome sequences of the 11 PSP and their mothers. Partial genomes were not included. Mother-child pairs are distinguished by colors and maternal sequences are marked. HXB2 sequence and reference sequences for clades A, B, C, D, F, G, and H are included. Bootstrap values >0.75 based on 1,000 bootstrap replicates are shown. Scale bar shows number of substitutions per site.

Table S1 shows HLA-associated escape mutations that developed in the VNC child 517-C. Table S2 shows HLA-associated escape mutations that developed in the VNC child 021-C. Table S3 shows 11 HLA-B\*42:01-positive and/or HLA-B\*81:01-positive children from Southern Africa in whom autologous virus encoded a Gag-TL9 variant. Table S4 shows epitopes used in the analysis of pediatric deep-sequence data. Tables S1-S4 are provided as Excel files.
